SUMMER 2021 | VOLUME 33 | NUMBER 3

# The Journal of Neuropsychiatry

## and Clinical Neurosciences

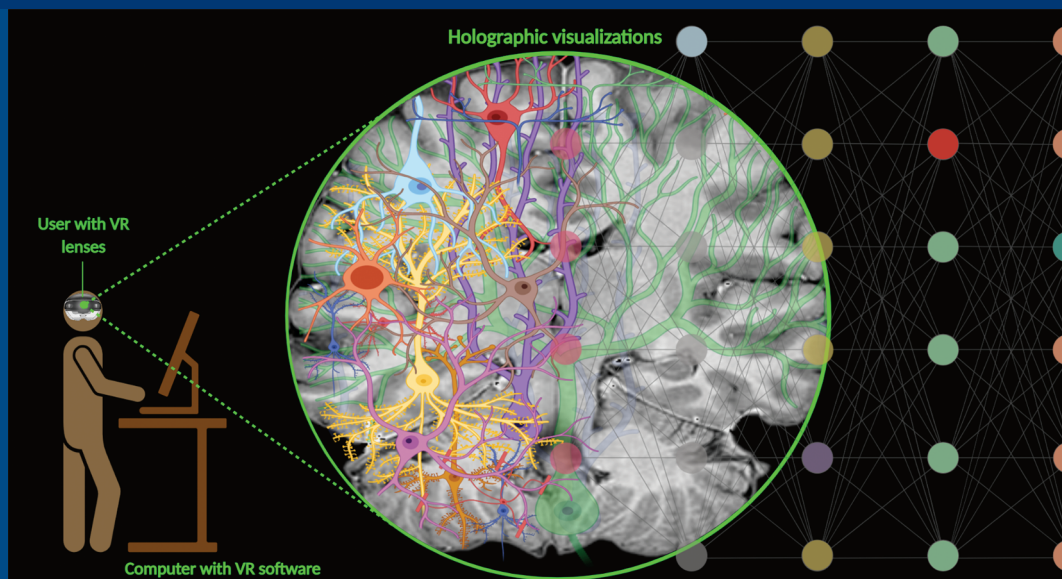

White Matter Disease and Psychiatric Dysfunction:  
Clinical and Neurobiological Insights

Developing Precision Invasive Neuromodulation for Psychiatry

Etiologies of Delirium in Consecutive COVID-19 Inpatients and  
the Relationship Between Severity of Delirium and COVID-19  
in a Prospective Study With Follow-Up

Assessing Sleep Concerns in Individuals With Acquired  
Brain Injury: The Feasibility of a Smartpad Sleep Tool

2021 American Neuropsychiatric Association  
Annual Meeting Abstracts

Official Journal of the American Neuropsychiatric Association  
[neuro.psychiatryonline.org](http://neuro.psychiatryonline.org)
